# Climatic warming strengthens a positive feedback between alpine shrubs and fire

James S Camac<sup>a,b</sup>, Richard J Williams<sup>c</sup>, Carl-Henrik Wahren<sup>b</sup>, Ary A Hoffmann<sup>d</sup>, and Peter A Veska<sup>a</sup>

<sup>a</sup>The Centre of Excellence for Environmental Decisions, School of BioSciences, The University of Melbourne, Melbourne, Victoria 3010, Australia; <sup>b</sup>Research Centre for Applied Alpine Ecology, La Trobe University, Melbourne, Victoria 3086, Australia; <sup>c</sup>CSIRO Land and Water, Tropical Ecosystems Research Centre, PMB 44 Winnellie, Northern Territory 0821, Australia; <sup>d</sup>Bio21 Institute, School of BioSciences, The University of Melbourne, Victoria 3010, Australia

This manuscript was compiled on November 12, 2016

## Abstract

Climate change is expected to increase fire activity and woody plant encroachment in arctic and alpine landscapes. However, the extent to which these increases interact to affect the structure, function and composition of alpine ecosystems is largely unknown. Here we use field surveys and experimental manipulations to examine how warming and fire affect recruitment, seedling growth and seedling survival in four dominant Australian alpine shrubs. We found that fire increased establishment of shrub seedlings by as much as 33-fold. Experimental warming also doubled growth rates of tall shrub seedlings and could potentially increase their survival. By contrast, warming had no effect on shrub recruitment, post-fire tussock regeneration, or how tussock grass affected shrub seedling growth and survival. These findings indicate that warming, coupled with more frequent or severe fires, will likely result in an increase in the cover and abundance of evergreen shrubs. Given shrubs are one of the most flammable components in alpine and tundra environments, warming is likely to strengthen an existing feedback between woody species abundance and fire in these ecosystems.

*Keywords:* Bayesian models, Biotic interactions, Gap dynamics, Growth, Mortality, Recruitment

## Introduction

Accurately forecasting the effects of climatic warming on vegetation dynamics requires an understanding of the mechanisms by which climate and vegetation interact. Most forecasting models include the direct effects of climatic conditions on species distributions, but largely ignore disturbances, particularly their type, frequency and severity (Guisan & Thuiller, 2005; Tucker *et al.*, 2012). Recurrent disturbance is integral to all ecosystems, strongly influencing fundamental demographic processes such as recruitment and mortality, and thus the composition and structure of plant communities and biomes worldwide (Bond *et al.*, 2005; Turner, 2010). Disturbance regimes are already changing as a consequence of climate change (Turner, 2010; Westerling *et al.*, 2011; Bradstock *et al.*, 2014). It is therefore imperative we understand how the effects of disturbance will interact with climate change, and whether such effects amplify or diminish how vegetation responds to changing temperature and moisture (Post & Pedersen, 2008; Camac *et al.*, 2015; Enright *et al.*, 2015)

Understanding the feedback between climate, vegetation and fire will be particularly important in order to accurately predict the trajectory of ecosystem change in coming decades (Bowman *et al.*, 2009). In addition to the direct effects of warming on fire weather, changing climate may also indirectly alter fire regimes by altering vegetation productivity, structure and composition (Keeley *et al.*, 2012; Matthews *et al.*, 2012; Bowman *et al.*, 2014). Such feedbacks may be positive or negative, and have been documented in tropical savanna (Hoffmann, 2003), boreal forests (Krawchuk & Cumming, 2011), grasslands (Flannigan *et al.*, 2009) and alpine and arctic environments (Goetz *et al.*, 2007; Wookey *et al.*, 2009).

Alpine and arctic vegetation are considered to be particularly vulnerable to the effects of changing climate (Engler *et al.*, 2011; Dullinger *et al.*, 2012; Elmendorf *et al.*, 2012a). In these ecosystems, field manipulative experiments have shown that climate directly influences plant phenology (Hoffmann *et al.*, 2010; Dorji *et al.*, 2013), reproduction (Klady *et al.*, 2011), morphology (Hudson & Henry, 2009), growth (Hollister *et al.*, 2005), floristic composition (Elmendorf *et al.*, 2012a) and biotic interactions (Klanderud, 2005). However, most studies in these ecosystems have focused on mature plant responses in undisturbed vegetation (Briceño *et al.*, 2015). Few have included disturbance as a factor (but see: Munier *et al.*, 2010; Graae *et al.*, 2010; Camac *et al.*, 2015), or examined the influence of climate change on seedlings in post-disturbance environments. As a consequence, little is known about how climate affect seedling demographic rates (Briceño *et al.*, 2015), particularly in alpine and tundra post-disturbance conditions. This is despite mounting evidence that seedling regeneration is important in alpine and arctic ecosystems (Venn & Morgan, 2009; Briceño *et al.*, 2015), particularly for woody species (Camac *et al.*, 2013; Williams *et al.*, 2014). Seedlings are the life stage that determines the long-term persistence of a species as well as its capacity to establish in new areas (Walck *et al.*, 2011). As such, in order to accurately predict future trajectories of vegetation change in alpine and arctic ecosystems, it

J.C. conceived, designed and performed the experiments, field surveys and analysis; C-H.W, R.W, A.H and P.V. supervised the development of this work, aided in data collection and provided statistical advice. All authors contributed to the writing of this manuscript.

The authors declare that they have no competing financial interests.

<sup>1</sup>To whom correspondence should be addressed. E-mail: james.camac@gmail.com

125 is imperative we understand how seedlings respond to both  
 126 changing climate and disturbance regimes (Walck *et al.*, 2011;  
 127 Briceño *et al.*, 2015).

### 130 Feedback between climatic warming, fire and shrubs

131 In alpine and arctic ecosystems, warming experiments and  
 132 long-term monitoring have documented significant increases  
 133 in the growth and cover of woody species (Sturm *et al.*, 2001;  
 134 Walker *et al.*, 2006; Myers-Smith *et al.*, 2011). The frequency  
 135 and extent of wildfires in these environments have also increased  
 136 over recent decades, a trend expected to continue (Westerling  
 137 *et al.*, 2006; Flannigan *et al.*, 2009; Qiu, 2009; Bradstock  
 138 *et al.*, 2014). Current evidence from these ecosystems  
 139 indicates that shrub recruitment and encroachment is highest  
 140 in disturbed areas and lowest in areas with minimal bare ground  
 141 cover (Williams & Ashton, 1987; Batllori *et al.*, 2009; Frost  
 142 *et al.*, 2013). Evidence also suggests that climatic warming  
 143 is likely to increase growth rates of woody species (Arft  
 144 *et al.*, 1999; Elmendorf *et al.*, 2012b; Myers-Smith *et al.*,  
 145 2011) and that shrubs are potentially the most flammable  
 146 vegetation component in these ecosystems (Williams *et al.*,  
 147 2006; Higuera *et al.*, 2009; Fraser *et al.*, 2016). Thus, increases  
 148 in the cover of woody species in alpine and arctic environments  
 149 may increase the flammability of these ecosystems.

150 The results of these studies suggest a positive feedback  
 151 could exist between warmer temperatures, woody species and  
 152 fire in alpine and tundra environments (Fig. 1a). Specifically,  
 153 warmer temperatures may lead to more frequent and severe  
 154 fire, which in turn, may increase recruitment opportunities  
 155 (i.e. more bare ground) for woody species and increase shrub  
 156 thickening both within and beyond shrub boundaries (Racine  
 157 *et al.*, 2004; Lantz *et al.*, 2013). If this effect is coupled  
 158 with an increase in the growth and survival of shrub seedlings,  
 159 highly flammable fuels will accumulate at a faster rate, have  
 160 higher landscape connectivity, and ultimately lead to increases  
 161 in the likelihood of fire. The consequence of which will further  
 162 increase shrub recruitment opportunities. Thus, warming  
 163 could strengthen an existing climate-disturbance feedback,  
 164 that not only has the potential to cause rapid changes in the  
 165 composition and structure of alpine and arctic vegetation,  
 166 but also has serious social, biodiversity and carbon sequestration  
 167 consequences (Mack *et al.*, 2011).

168 While paleoecological studies have indicated that such a  
 169 feedback may exist in the arctic (Higuera *et al.*, 2008, 2009),  
 170 there is a paucity of information on what may strengthen,  
 171 mitigate or break this feedback. For example, we have little  
 172 information on whether fire will stimulate shrub seedling  
 173 recruitment in alpine or tundra ecosystems, nor do we know  
 174 how rates of seedling growth and survival will be affected  
 175 under warmer, more exposed, post-fire conditions. Further-  
 176 more, we do not know how tussock grasslands will respond  
 177 to warmer post-fire conditions, how grasses affect vital rates  
 178 of shrub seedlings, or whether such effects are altered by  
 179 warmer post-fire conditions.

180 Here, we examine these unknowns and their impacts on  
 181 this proposed feedback between climatic warming, shrubs and  
 182 fire in Australian alpine vegetation. As with other tundra  
 183 ecosystems, Australian alpine landscapes consist of a mosaic  
 184 of vegetation types dominated by either herbaceous or woody  
 185 species (Williams *et al.*, 2014). They have also experienced  
 186 significant changes in climate. Since 1979, mean growing

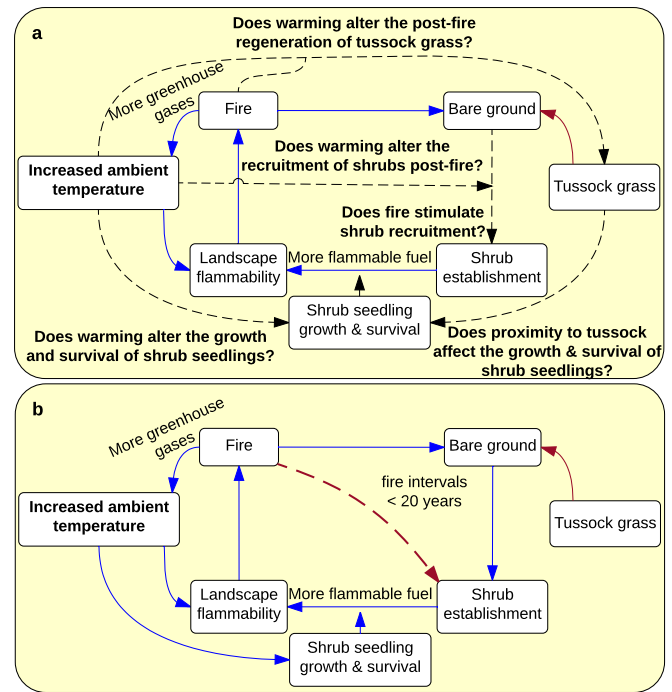

187  
188  
189  
190  
191  
192  
193  
194  
195  
196  
197  
198  
199  
200  
201  
202  
203  
204  
205  
206  
207  
208  
209  
210  
211  
212  
213  
214  
215  
216  
217  
218  
219  
220  
221  
222  
223  
224  
225  
226  
227  
228  
229  
230  
231  
232  
233  
234  
235  
236  
237  
238  
239  
240  
241  
242  
243  
244  
245  
246

**Fig. 1.** Conceptual diagram illustrating positive warming-shrub-fire feedback. (a) Hypothesised positive feedback loop between fire, climatic warming and landscape flammability. Solid lines = known mechanisms; Dashed lines = mechanisms that may exacerbate or diminish this feedback but which we have a paucity of information on. (b) Feedback updated based on new evidence obtained from experimental and field surveys conducted in this study. Also includes an example of a potential, but unlikely, effect (red dashed line) that could break this feedback. Blue = positive relationships, Red = negative relationships.

season temperatures have risen by approximately 0.4°C and annual precipitation has fallen by 6% (Wahren *et al.*, 2013), with a consequent decline in snow pack depth (Sánchez-Bayo & Green, 2013). These climatic changes have been correlated with a 10 to 20% increase in shrub cover and a 25% decline in graminoids cover (Wahren *et al.*, 2013). Much of the Australian Alps has also been burnt by recent (2003 and 2006) wildfires, the frequency and severity of which are expected to increase as a consequence of further climate change (Bradstock *et al.*, 2014; Williams *et al.*, 2014).

In this study we took advantage of recent fires in alpine open heathland, a plant community that occupies ca. 25% of the Australian alpine landscape (Williams *et al.*, 2014). Under global warming, open heathland is likely to encroach upon grasslands, wetlands and herbfields (including the nationally endangered snow patch herbfields; Williams *et al.*, 2015), and is itself susceptible to shrub thickening (McDougall, 2003). To identify some of the biotic and abiotic factors that affect shrub establishment and how warmer post-fire conditions affect shrub seedling vital rates, we combined field observations of post-fire seedling densities with a warming experiment that used seedlings of four dominant Australian evergreen fire-killed shrubs: *Grevillea australis* (Proteaceae; a tall shrub), *Asterolasia trymalioides* (Rutaceae; a prostrate shrub), *Phelbalium squamulosum* (Rutaceae; a tall shrub) and *Prostanthera cuneata* (Lamiaceae; a tall shrub).

This combination of data allowed us to quantify the following unknowns in the hypothesised climate-fire-shrub feedback

249 loop (Fig. 1a):

- 250 1. Does fire stimulate shrub recruitment?
- 251
- 252 2. Does warming alter the recruitment of shrubs post-fire?
- 253
- 254 3. Does warming alter the growth and survival of shrub
- 255 seedlings?
- 256 4. Does proximity to tussock grass affect the growth and
- 257 survival of shrub seedlings?
- 258 5. Does warming alter the post-fire regeneration of tussock
- 259 grass?
- 260

## 261 Methods

262 Below, we provide a summary of the experimental design  
263 and analysis. Full details are presented in the Supporting  
264 Information.

265  
266 **Study Sites.** The Australian Alps are an ideal place to examine  
267 the proposed fire-climate-vegetation feedback because they  
268 have all the elements needed to demonstrate such a feedback.  
269 The Alps are subject to recurrent landscape fire (approximately  
270 every 50 to 100 years), and were burnt extensively in 2003  
271 (Williams *et al.*, 2006, 2014). The vegetation consists of a  
272 range of life forms (graminoids, forbs and shrubs), of which  
273 shrub abundance strongly determines landscape flammability  
274 (Williams *et al.*, 2006; Fraser *et al.*, 2016). There is also  
275 evidence that both fire regimes (Bradstock *et al.*, 2014) and  
276 the relative abundance of life forms in the Australian Alps have  
277 changed as a consequence of recent climate change (Wahren  
278 *et al.*, 2013; Camac *et al.*, 2015).

279  
280 We investigated shrub-grass dynamics in open heathland  
281 on the Bogong High Plains, Australia. Open heathland is a  
282 common Australian alpine vegetation type, occupying approx-  
283 imately 25% of the treeless landscapes above 1600m in the  
284 Australian Alps. It is an ecotone between closed heathland  
285 (>70% shrub cover) and tussock grassland (shrub cover <  
286 20%). Open heathland is dominated by the shrub *Grevil-*  
287 *lea australis* (shrub cover generally 20–60%) with inter-shrub  
288 regions occupied by snow grasses (*Poa hiemata* and *Poa cos-*  
289 *tiniana*) and other herbaceous species. *Grevillea australis* is  
290 an obligate seeding shrub, and establishment of seedlings is de-  
291 pendent on disturbance creating bare ground in the grass–herb  
292 sward (Williams & Ashton, 1987). Relative to tussock grass-  
293 land, open heathland is a highly flammable plant community  
294 (Williams *et al.*, 2006; Fraser *et al.*, 2016). A consequence of  
295 this differential flammability led to the 2003 wildfires on the  
296 Bogong High Plains burning approximately 60% of open heath-  
297 land and only 13% of tussock grasslands. Following these fires,  
298 seedling regeneration of *Grevillea australis* and other shrubs  
299 was prolific (Williams *et al.*, 2014).

300  
301 **Open Top Chamber Experiment.** In March 2010, at 1750 m  
302 a.s.l, we burnt 32 randomly selected mature (60 cm tall and  
303 1.5 m<sup>2</sup>) *Grevillea australis* shrubs in an open heathland site  
304 that was not burnt by wildfire in 2003 or 2006. This cre-  
305 ated patches of bare ground approximately 0.7 m<sup>2</sup> surrounded  
306 by burnt tussock grass, simulating disturbance of individual  
307 shrubs in open heathland burnt by wildfire. We collected  
308 seedlings of dominant alpine shrub species from a nearby (<2  
309 km) site of similar altitude burnt by 2006 wildfires. We col-  
310 lected seedlings of two dominant open heathland shrub species

*Grevillea australis* (Proteaceae; a tall shrub) and *Asterola-*  
311 *sia trymalioides* (Rutaceae; a prostrate shrub), a dominant  
312 closed heathland species *Prostanthera cuneata* (Lamiaceae;  
313 a tall shrub) that typically grows on warmer aspects and a  
314 species common to both open and closed heathland *Phebal-*  
315 *ium squamulosum* (Rutaceae; a tall shrub). We focused on  
316 these four species because they are common in the Australian  
317 Alps; are fire-killed and thereby re-establish via seed (the  
318 dominant shrub post-fire strategy in the Australian mainland  
319 Alps; Walsh & McDougall, 2004); and under climatic warm-  
320 ing, have the potential to increase in cover and height within  
321 heathlands, and invade non-shrubby plant communities such  
322 as alpine grasslands and herbfields.

323  
324 A total of 640 seedlings, 256 *Grevillea* (half used in *Poa*  
325 inter-tussock experiment—see below) and 128 for each of *Aster-*  
326 *olasia*, *Prostanthera* and *Phebalium* were used. Four seedlings  
327 per species were randomly selected and transplanted into a  
328 4×4 square grid in the center of each burnt patch, with 14  
329 cm between individuals and the edge of the patch, which was  
330 dominated by resprouting tussock grass *Poa hiemata*. To ex-  
331 amine interactions between tussock grass and shrub seedlings  
332 we also randomly transplanted four additional *Grevillea aus-*  
333 *tralis* seedlings into various sized bare gaps between burnt *Poa*  
334 *hiemata* tussocks that were immediately surrounding the 4×4  
335 bare ground square grid (Fig. S1). The experimental site was  
336 fenced to prevent grazing by deer and horses. We detected  
337 no obvious signs of herbivory by invertebrates or hares within  
338 our plots.

339  
340 To simulate near-term warmer conditions indicated by the  
341 IPCC (2013), we randomly assigned Open Top Chambers  
342 (OTCs) to half (16) the plots, with the remainder treated as  
343 unwarmed controls. The chambers were constructed following  
344 the International Tundra Experiment (ITEX) protocols (Molau  
345 & Mølgaard, 1996). OTCs were placed over plots, ensuring  
346 all seedlings (including inter-tussock shrub seedlings) occurred  
347 within the 1.1 m<sup>2</sup> open top to minimise edge effects. OTCs  
348 were placed out at the start of the growing season (October)  
349 where they remained until first snowfall (early June). This  
350 procedure was repeated for six growing seasons from May 2010  
351 to May 2016.

352  
353 Microclimatic conditions were measured hourly using Onset  
354 Micro Stations (Onset Computer Corporation, Bourne, MA,  
355 USA) at four control and four OTC plots. Across six growing  
356 seasons (1281 growing season days), OTCs simulated warmer  
357 conditions at the lower end of IPCC (2013) projections (Fig.  
358 S6-S8). OTCs passively increased average ambient and soil  
359 temperatures by 0.9°C. Minimum and maximum temperatures  
360 were also raised in both ambient air (min: 1.1°C; max: 2°C)  
361 and soil (min: 2°C; max: 0.1°C). Chambers only marginally  
362 decreased soil moisture by 0.1% and relative humidity by 0.7%.

363  
364 Seedling survival, maximum height and stem diameter  
365 (nearest mm measured with Vernier calipers) were initially  
366 recorded in May 2010 and then subsequently re-measured at  
367 the end of each growing season (May-June). At the same  
368 time, we recorded the distance to the nearest tussock or  
369 grass seedling in each of four cardinal directions for *Gre-*  
370 *villea* seedlings growing in inter-tussock gaps. Thus, temporal  
371 changes in inter-tussock gap size could be due to either vege-  
372 tative growth of resprouting tussocks, or the establishment of  
373 grass seedlings. We did not measure individual characteristics  
374 (e.g. height and basal diameter) of surrounding tussock grass  
375

373 because we could not distinguish individuals, and because  
 374 height varied substantially throughout the season. Numbers  
 375 of natural *Grevillea australis* recruits establishing within the  
 376 plots were also recorded and identified for the first two years  
 377 of the experiment.

378  
 379 **Seedling gradient study.** We used 40 open heathland monitoring  
 380 sites established after the 2003 fires (Williams *et al.*, 2006;  
 381 Camac *et al.*, 2013). These sites consisted of 30 burnt sites and  
 382 10 sites known to be unburnt for over 70 years. The disparity  
 383 in sample number between burnt and unburnt treatments was  
 384 due to very few open heathland sites of sufficient size (0.25  
 385 ha) remaining unburnt after both the 2003 and 2006 fires.  
 386 In the summer of 2011-12, at each site, seedling density/m<sup>2</sup>  
 387 was estimated using 40 quadrats, each 1 m<sup>2</sup>, that were evenly  
 388 distributed in groups of 10 along four 50 m transects, with  
 389 10 m between transect lines, subsampling an area of 2000 m<sup>2</sup>.  
 390 Within plots we recorded the number and maximum height  
 391 of *Grevillea* and *Asterolasia* seedlings. For unburnt sites we  
 392 counted the number of mature *Grevillea* plants (>0.5 m<sup>2</sup>)  
 393 within 5 m of each transect. In burnt sites, this required  
 394 counting the number of skeletons (there were no living adults  
 395 at any burnt site) that still persisted post-fire. We were unable  
 396 to estimate numbers of adult *Asterolasia* because this species  
 397 does not have a persistent woody skeleton post-fire. Site  
 398 level data, elevation and Topographic Wetness Index (TWI; a  
 399 measure of plant available water, Moore *et al.*, 1993) were  
 400 obtained from a 30 m resolution digital elevation model. Lastly,  
 401 for burnt sites, fire severity was estimated by twig diameters  
 402 (Whight & Bradstock, 1999), collected immediately after the  
 403 2003 fires (Williams *et al.*, 2006).

404  
 405 **Data analysis.** We built multiple hierarchical models to examine  
 406 how increased temperature and other factors influenced shrub  
 407 seedling recruitment, growth and mortality, as well as tussock-grass  
 408 gap dynamics. For each model we used Bayesian inference and fitted  
 409 models in R 3.3.1 (R Core Team, 2016) using package rstan 2.12.1  
 410 (Stan Development Team, 2016). Detailed information about  
 411 experimental design and analysis is provided in the Supporting  
 412 Information. Data and source code are available at:  
 413 [https://github.com/jscamac/Alpine\\_Shrub\\_Experiment](https://github.com/jscamac/Alpine_Shrub_Experiment). In order  
 414 to aid in the reproducibility of this work, our code was written  
 415 using a remake framework (FitzJohn, 2015), such that others  
 416 can readily reproduce our entire workflow from data processing,  
 417 through to producing a pdf of this manuscript by calling  
 418 remake() in R.

## 421 Results

422  
 423 **Drivers of shrub seedling establishment.** We first investigated  
 424 how altitude, Topographic Wetness Index (TWI), adult density,  
 425 fire and fire severity (as measured by post-fire twig diameters—  
 426 see Supporting Information) influenced the density of *Grevillea*  
 427 and *Asterolasia* seedlings (the two dominant shrubs of alpine  
 428 open heathland). Across the 40 alpine sites surveyed in 2011-12  
 429 we found that the abundance of *Grevillea* (Fig. 2) and *Asterolasia*  
 430 (Fig. S2) seedlings was strongly influenced by the occurrence  
 431 of fire. Sites burnt in 2003 had seedling densities between 15  
 432 and 33 times higher than unburnt sites. The mean seedling  
 433 density of *Grevillea*, was 1.31/m<sup>2</sup> at burnt sites and 0.04/m<sup>2</sup>  
 434 at unburnt sites. *Asterolasia* had similar mean

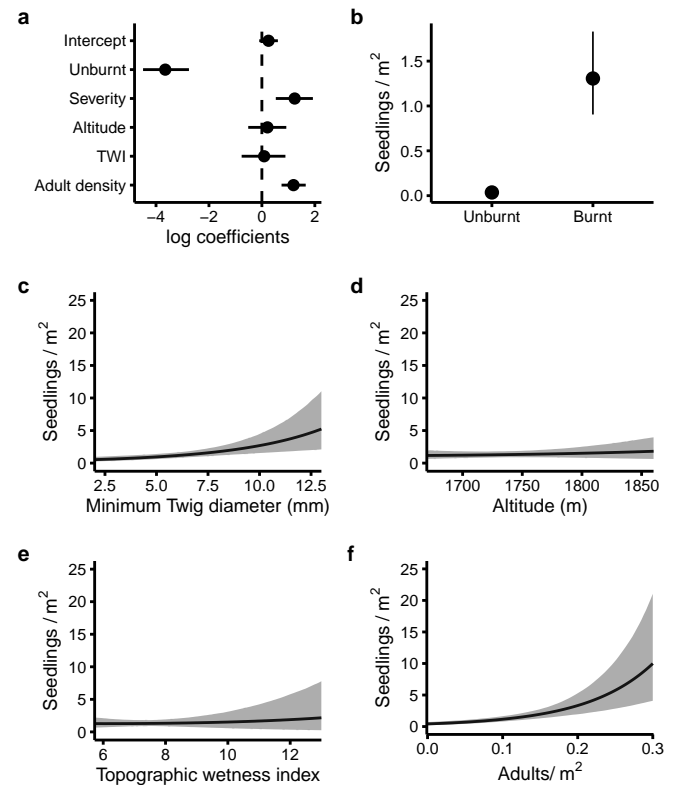

463 **Fig. 2.** Mean *Grevillea australis* seedling density as a function of burning  
 464 (burnt/unburnt), fire severity (twig diameter), altitude, Topographic Wetness Index  
 465 (TWI) and adult density. (a) Centered and standardized model coefficients (on the  
 466 log scale); and effects of: (b) burning, (c) fire severity, (d) altitude, (e) topographic  
 467 wetness and (F) adult density, in areas burnt by the 2003 fires. All bars and shaded  
 468 areas indicate 95% Bayesian Credible Intervals.

469 densities: 1.65 and 0.11 seedlings/m<sup>2</sup> at burnt and unburnt  
 470 sites, respectively. For both species, seedling density increased  
 471 with increasing fire severity (i.e. sites with larger post-fire  
 472 twig diameters). As hypothesised, pre-fire adult density also  
 473 positively influenced *Grevillea* seedling density. For both shrub  
 474 species, we detected no change in seedling density along a 190  
 475 m elevational gradient (equivalent to a 1.5°C change in mean  
 476 temperature; Brown & Millner, 1989). This is consistent with  
 477 the field warming experiment (see below) which indicated rates  
 478 of recruitment (Fig. S3) and mortality in *Grevillea* is largely  
 479 insensitive to a 0.9°C change in temperature. We detected no  
 480 strong effect of Topographic Wetness Index for either species.

481  
 482 **Experimental warming and shrub seedling growth.** Given that  
 483 seedlings were more abundant in burnt vegetation, we investigated  
 484 how warmer post-fire conditions affected seedling growth and  
 485 mortality rates. Seedlings of *Grevillea*, *Asterolasia*,  
 486 *Phebalium* and *Prostanthera* emerging after a wildfire were  
 487 transplanted into experimentally burnt plots. These plots were  
 488 either subjected to ambient conditions (i.e. controls), or enclosed  
 489 in Open Top Chambers (OTCs) which increased temperature by  
 490 0.9°C.

491  
 492 After 2182 days (1281 growing season days) or 6 years' growth,  
 493 mean seedling heights of the tall shrubs (*Grevillea*,  
 494 *Phebalium* and *Prostanthera*) growing in post-fire bare ground  
 495 were greater in warmed plots relative to controls by 11.8, 4.5  
 496 and 14.9 cm, respectively (Fig. 3a). Warming increased heights

497  
498  
499  
500  
501  
502  
503  
504  
505  
506  
507  
508  
509  
510  
511  
512  
513  
514  
515  
516  
517  
518  
519  
520  
521  
522  
523  
524  
525  
526  
527  
528  
529  
530  
531  
532  
533  
534  
535  
536  
537  
538  
539  
540  
541  
542  
543  
544  
545  
546  
547  
548  
549  
550  
551  
552  
553  
554  
555  
556  
557  
558

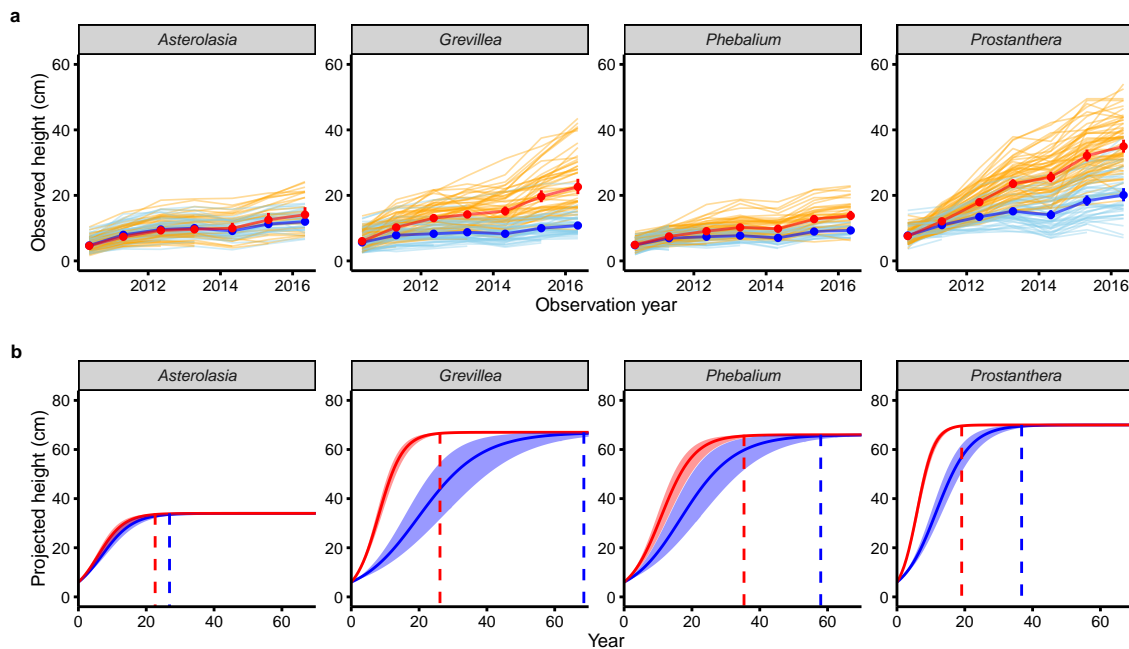

**Fig. 3.** Observed and projected growth trajectories of four dominant Australian alpine shrubs. (a) Observed height growth: Thick lines with error bars represent mean ( $\pm$  95% confidence intervals) observed heights at each May census. Thin lines represent individual growth trajectories. (b) Mean ( $\pm$  95% Bayesian Credible Interval) projected growth trajectories. In all cases, red and orange lines = seedlings growing in warmed (OTC) conditions and blue and light blue lines = seedlings growing in control conditions. Projections were based on an logistic growth model using initial seedling size of 6 cm (the mean initial height observed in the OTC experiment) and mean maximum heights observed in long-unburnt sites (i.e. 34, 67, 66 & 70 cm for *Asterolasia*, *Grevillea*, *Phebalium*, & *Prostanthera*, respectively). Vertical lines delimit year in which maximum height is obtained

of both *Grevillea* and *Prostanthera* seedlings in all years, while *Phebalium* did not respond to the warming treatment until the second growing season. By contrast, seedlings of the prostrate shrub, *Asterolasia*, showed no difference in growth rate between warmed and control plots in any year. For each species, similar treatment effects were observed for stem diameter growth (Fig. S4). Accounting for initial height and assuming logistic growth, the rates of change in mean annual predicted height of *Grevillea*, *Phebalium* and *Prostanthera* were 2.5, 1.6 and 2 times that observed in control plots, respectively. According to this model, a 6 cm seedling (the mean initial height of seedlings used in this experiment) attains maximum height 42 (*Grevillea*) or 18 years sooner (*Phebalium* and *Prostanthera*) when warmed by 0.9°C (Fig. 3b). *Asterolasia* was predicted to reach its maximum height in approximately 23 to 27 years, irrespective of warming treatment.

The growth responses of both *Grevillea* and *Asterolasia* observed in experimentally warmed plots were validated by the maximum heights of post-fire recruits across 30 open heathland sites burnt in 2003. Here, a 190 m altitudinal range is equivalent to a mean ambient temperature difference of approximately 1.5°C (Brown & Millner, 1989), which is comparable to that observed between experimentally warmed and control plots (0.9°C). In response to shifts in temperature, the maximum height of *Grevillea* post-fire recruits was expected to decrease with elevation, whereas *Asterolasia* seedlings were not expected to show this pattern. Our experimental predictions were verified (Fig. S5). Mean maximum height of *Grevillea* seedlings in burnt open heathland were 8 cm taller at 1670 m a.s.l compared to seedlings at 1860 m a.s.l. (22 cm vs 14 cm; a difference comparable to our experimental findings). In

contrast, mean maximum height of *Asterolasia* seedlings did not vary significantly with elevation. Topographic Wetness Index and fire severity had no detectable influence on maximum seedling heights in either species.

**Experimental warming and shrub seedling mortality.** After six years and across all plots, 36% (185 out of 511) of all seedlings transplanted into the 4x4 bare ground square grid had died. Most deaths occurred in *Asterolasia* (67) and *Phebalium* (67), followed by *Grevillea* (36) and *Prostanthera* (15). *Prostanthera* showed the largest treatment effect (Fig. 4), with annual mortality rates estimated to be near 0% in warmed plots and 4% in control plots. This significant decrease in mortality may be a consequence of OTCs reducing the severity of spring frosts by rising minimum ambient and soil temperatures by 1.1°C and 2°C, respectively (Fig. S6-S8). Warming also reduced mean seedling mortality in *Grevillea* and *Phebalium* (Fig. 4); however, for both species, the effect was highly uncertain (i.e. credible intervals overlap). By contrast, annual mortality rates in the prostrate shrub, *Asterolasia*, were marginally higher in warmed plots, but again this effect was highly uncertain (Fig. 4).

**Effects of tussock grass proximity on shrub seedling growth and mortality rates.** Climate change is expected to alter biotic interactions because their strength and direction depend strongly on climatic conditions, particularly in alpine and arctic ecosystems (Callaway *et al.*, 2002; Klanderud, 2005). Here, we assess the interactive effects of warming and grass proximity on the growth and survival of *Grevillea* seedlings transplanted into various sized inter-tussock gaps. We detected

559  
560  
561  
562  
563  
564  
565  
566  
567  
568  
569  
570  
571  
572  
573  
574  
575  
576  
577  
578  
579  
580  
581  
582  
583  
584  
585  
586  
587  
588  
589  
590  
591  
592  
593  
594  
595  
596  
597  
598  
599  
600  
601  
602  
603  
604  
605  
606  
607  
608  
609  
610  
611  
612  
613  
614  
615  
616  
617  
618  
619  
620

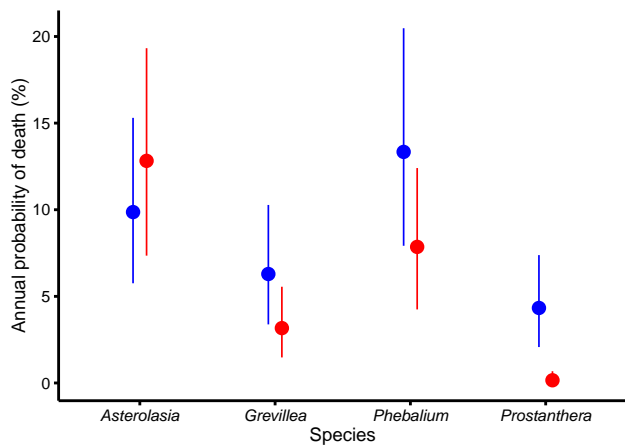

Fig. 4. Mean ( $\pm$  95% Bayesian Credible Interval) annual probability of death for each species growing in control (blue) and warmed (red) conditions.

a strong positive effect of warming treatment on growth rates and a marginally non-significant decrease in mortality (Fig. 5). However, we did not detect significant inter-tussock gap size effects or an interaction between gap size and warming treatment on either growth or mortality rates (i.e. coefficient credible intervals overlap zero).

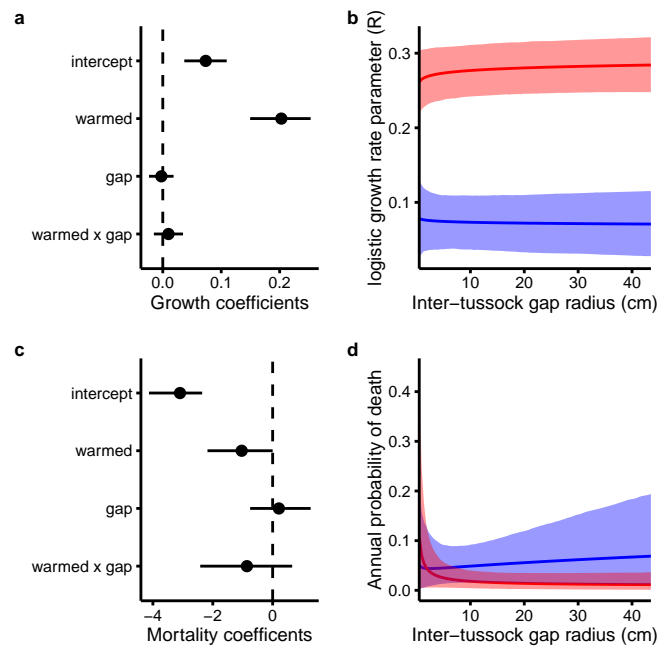

Fig. 5. Experimental warming and inter-tussock gap size effects on *Grevillea australis* seedlings. Top rows = Growth rate effects, Second row = Mortality effects. (a & c) Centered and standardized model coefficients; (b & d) growth and mortality rate response curves along an inter-tussock gap size gradient in warmed (red) and control (blue) conditions. All error bars and shading are 95% Bayesian Credible Intervals.

**Experimental warming and rates of gap infilling by tussock grass.** Despite having little impact on shrub seedling growth and mortality rates, tussock grass may still limit shrub recruitment, and thus, shrub expansion, by infilling post-fire bare

ground gaps (whether by vegetative growth or seedlings) faster under warmer conditions. Using six years of post-fire inter-tussock gap size changes in warmed and unwarmed plots, we found that gaps were being infilled by tussock grasses (Fig. 6). However, the rate at which this occurred was very slow, with a 10 cm radius gap predicted to decrease by approximately 3 cm over a ten year period. We also detected no significant effect of a 0.9°C temperature rise on the rate of infilling.

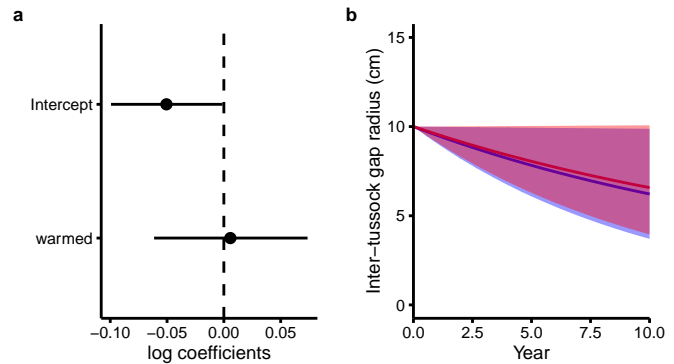

Fig. 6. Effects of warming on rates of gap infilling by tussock grass. (a) Model coefficients and (b) projected temporal change in size for an average 10 cm inter-tussock gap in warmed (red) and unwarmed (blue) conditions. All error bars and shading are 95% Bayesian Credible Intervals.

## Discussion

In this study we have quantified several unknown interactions between fire, shrub-grass relationships and climate to extend a conceptual model of alpine shrub dynamics under climate change (Fig. 1b). In particular, we have shown how these interactions strengthen a hypothesized feedback that can rapidly increase shrub cover in the Australian Alps, and potentially, other alpine and tundra ecosystems (Higuera *et al.*, 2008). While high cover of tussock grass is known to inhibit the establishment of shrub seedlings (Williams & Ashton, 1987), fire can create bare ground necessary for shrub seedling establishment. Our results highlight that fire can increase shrub seedling establishment by as much 33-fold. Our results also indicate that if a shrub seedling manages to establish in a bare ground patch, its rate of growth and survival are not affected by tussock grass proximity, irrespective of warming. More importantly, our findings indicate that for tall shrubs, a 1°C increase in mean growing season temperature will result in a doubling of growth rates and a potential increase in survival. The consequence of these demographic effects will likely manifest as shrub thickening within and at shrub community boundaries. This in turn, will facilitate shrub establishment, via increased seed pools, into non-shrubby communities.

Landscape flammability, and thus fire, are also likely to increase as a result of warming effects on shrub seedling vital rates. Evidence from field studies of burning patterns (Williams *et al.*, 2006), quantification of fuel mass and architecture (Fraser *et al.*, 2016) and paleoecological studies (Higuera *et al.*, 2008, 2009) indicate that shrubs are the most flammable component of alpine and tundra ecosystems (significantly more than tussock grassland; Fraser *et al.*, 2016). In the Australian Alps, this differential flammability resulted in approximately 60% of open heathland and only 13% of

745 tussock grasslands being burnt by the extensive 2003 wild-  
746 fires. Consequently, our results indicate that flammable fuel  
747 loads will accumulate twice as fast under a warmer climate.  
748 Ultimately this will further strengthen the feedback between  
749 shrubs and fire by increasing the frequency and severity of  
750 fires, which in turn, will create more bare ground, and thus  
751 more shrub recruitment opportunities both within and beyond  
752 current shrub boundaries —Recruitment opportunities that  
753 could persist for decades (Williams *et al.*, 2014).

754 While we have addressed several unknowns between cli-  
755 matic warming, shrubs and fire, there are others we have not  
756 addressed that may also strengthen, weaken or break this  
757 feedback. The most obvious mechanism that will break this  
758 cycle involves short fire intervals that prevent fire-killed shrubs  
759 reaching reproductive age and thereby exhausting the seedbank  
760 (Enright *et al.*, 2015). However, this scenario is unlikely for the  
761 majority of alpine (or tundra) landscapes, including those in  
762 Australia. For example, in the Australian Alps, current fire in-  
763 tervals of 50 to 100 years would need to decrease to less than 20  
764 years—the time estimated for the species in this study to reach  
765 reproductive maturity (Williams *et al.*, 2008). Furthermore, if  
766 reproductive output is related to plant size (Wenk & Falster,  
767 2015), then climatic warming may allow fire-killed species to  
768 reach reproductive maturity sooner, and consequently, may  
769 increase their resilience to short fire intervals. Nevertheless,  
770 this and other factors such as changes in snow pack (Wipf  
771 *et al.*, 2009), soil moisture (Engler *et al.*, 2011), herbivory  
772 (Post & Pedersen, 2008) and adaptation (Byars *et al.*, 2009;  
773 Hoffmann & Sgrò, 2011) require further research because they  
774 are all likely to be altered by the interactive effects of climate  
775 and disturbance in unpredictable ways.

776 By focusing on the life stage most vulnerable to climate  
777 and disturbance, and which determines a species capacity to  
778 establish in new areas (Walck *et al.*, 2011; Briceño *et al.*, 2015),  
779 our analyses provide a possible explanation as to why shrub  
780 cover is increasing in the Australian Alps, often at the expense  
781 of grasslands (McDougall, 2003; Wahren *et al.*, 2013). An  
782 explanation that may also apply to other arctic and alpine  
783 ecosystems (Racine *et al.*, 2004; Myers-Smith *et al.*, 2011;  
784 Frost *et al.*, 2013; Lantz *et al.*, 2013). But more importantly,  
785 our results provide evidence for the underlying processes that  
786 could result in a warming-fire-shrub feedback that has been  
787 hypothesized in arctic paleoecological studies (Higuera *et al.*,  
788 2008, 2009). Based on current observations, average global  
789 temperature has already increased by 0.85°C since 1880 and  
790 is expected to rise by as much as 4.8°C by 2100 (IPCC, 2013).  
791 In alpine and tundra environments, temperatures (Chapin III  
792 *et al.*, 2005), shrub cover (Myers-Smith *et al.*, 2011) and the  
793 frequency and severity of fire (Westerling *et al.*, 2006; Flan-  
794 nigan *et al.*, 2009; Qiu, 2009; Bradstock *et al.*, 2014) have all  
795 increased in the last few decades. These changes mean that the  
796 warming-shrub-fire feedback identified here is likely to have  
797 already strengthened. If this is the case, other non-woody  
798 communities will become shrubbier and more flammable, the  
799 effects of which, will have significant consequences for carbon  
800 sequestration, water supply and biodiversity.

801  
802 **ACKNOWLEDGMENTS.** This research was funded through Aus-  
803 tralian Research Council Linkage Grants, partnered through the  
804 Department of Sustainability and Environment, Parks Victoria,  
805 Commonwealth Scientific and Industrial Research Organisation  
806 (CSIRO). Plot infrastructure was supported by the Long Term

Ecological Research Network. Funding was also received from the  
Centre of Excellence for Environmental Decisions (CEED) and  
Holsworth Research Committee. J.S.C was a recipient of an Aus-  
tralian Postgraduate Award. Monica Camac, Brad Farmilo, Monica  
Hursburgh, Paulius Kvicinskas, Karen Stott, Imogen Fraser, Sarah  
Bartlett, Paul Smart, Steven Rumbold, Lachlan Youn and Chris  
Jones provided assistance with field measurements. William Morris  
and John Baumgartner provided coding advice and Warwick Papst  
provided field logistic advice. Daniel Falster and Richard Fitzjohn  
for developing software that enabled these analyses to be readily  
reproducible. Special thanks to John Baumgartner, David Bowman,  
Manuel Esperón-Rodríguez, Anaïs Gibert, John Morgan, Kimberley  
Millers, Michaela Plein and Inka Veltheim for their comments on  
this manuscript.

## References

- Art AM, Walker MD, Gurevitch J, *et al.* (1999) Responses of Tundra plants to experimental to experimental warming: meta-analysis of the International Tundra Experiment. *Ecological Monographs*, **69**, 491–511.
- Battlori E, Camarero JJ, Ninot JM, Gutiérrez E (2009) Seedling recruitment, survival and facilitation in alpine *Pinus uncinatree* line ecotones. Implications and potential responses to climate warming. *Global Ecology and Biogeography*, **18**, 460–472.
- Bond WJ, Woodward FI, Midgley GF (2005) The global distribution of ecosystems in a world without fire. *New Phytologist*, **165**, 525–538.
- Bowman DMJS, Balch JK, Artaxo P, *et al.* (2009) Fire in the earth system. *Nature*, **324**, 481–484.
- Bowman DMJS, French BJ, Prior LD (2014) Have plants evolved to self-immolate? *Frontiers in plant science*, **5**, 123–9.
- Bradstock R, Penman T, Boer M, Price O, Clarke H (2014) Divergent responses of fire to recent warming and drying across south-eastern Australia. *Global Change Biology*, **20**, 1412–1428.
- Briceño VF, Hoyle GL, Nicotra AB (2015) Seeds at risk: How will a changing alpine climate affect regeneration from seeds in alpine areas? Verónica F. Briceño, Gemma L. Hoyle & Adrienne B. Nicotra. *Alpine Botany*, **125**, 59–68.
- Brown JAH, Millner FC (1989) Aspects of meteorology and hydrology in the Australian Alps. In: *The Scientific Significance of the Australian Alps* (ed. Good RB), pp. 122–171. Proceedings of the first Fenner Conference on the Environment, Canberra.
- Byars SG, Parsons Y, Hoffmann AA (2009) Effect of altitude on the genetic structure of an Alpine grass, *Poa hiemata*. *Annals of Botany*, **103**, 885–899.
- Callaway R, Brooker RW, Choler P, *et al.* (2002) Positive interactions among alpine plants increase with stress. *Nature*, **417**, 844–848.
- Camac JS, Williams RJ, Wahren CH, Jarrad F, Hoffmann AA, Vesik PA (2015) Modeling rates of life form cover change in burned and unburned alpine heathland subject to experimental warming. *Oecologia*, **178**, 615–628.
- Camac JS, Williams RJ, Wahren CH, Morris WK, Morgan JW (2013) Post-fire regeneration in alpine heathland: Does fire severity matter? *Austral Ecology*, **38**, 199–207.
- Chapin III FS, Sturm M, Serreze MC, *et al.* (2005) Role of land-surface changes in arctic summer warming. *Nature*, **310**, 657–660.
- Dorji T, Totland Ø, Moe SR, Hopping KA, Pan J, Klein JA (2013) Plant functional traits mediate reproductive phenology and success in response to experimental warming and snow addition in Tibet. *Global Change Biology*, **19**, 459–472.
- Dullinger S, Gattlinger A, Thuiller W, *et al.* (2012) Extinction debt of high-mountain plants under twenty-first-century climate change. *Nature Climate Change*, **2**, 619–622.
- Elmendorf SC, Henry GHR, Hollister RD, *et al.* (2012a) Global assessment of experimental climate warming on tundra vegetation: heterogeneity over space and time. *Ecology Letters*, **15**, 164–175.
- Elmendorf SC, Henry GHR, Hollister RD, *et al.* (2012b) Plot-scale evidence of tundra vegetation change and links to recent summer warming. *Nature Climate Change*, **2**, 453–457.
- Engler R, Randin CF, Thuiller W, *et al.* (2011) 21st century climate change threatens mountain flora unequally across Europe. *Global Change Biology*, **17**, 2330–2341.
- Enright NJ, Fontaine JB, Bowman DM, Bradstock RA, Williams RJ (2015) Interval squeeze: altered fire regimes and demographic responses interact to threaten woody species persistence as climate changes. *Frontiers in Ecology and the Environment*, **13**, 265–272.
- FitzJohn R (2015) *remake: Make-like build management*. URL <https://github.com/richfitz/remake>. R package version 0.2.0.
- Flannigan MD, Krawchuk MA, de Groot WJ, Wotton BM, Gowman LM (2009) Implications of changing climate for global wildland fire. *International Journal of Wildland Fire*, **18**, 483–507.
- Fraser JP, Williams RJ, Murphy BP, Camac JS, Vesik PA (2016) Fuels and landscape flammability in an Australian alpine environment. *Austral Ecology*. doi:10.1111/aec.12355.
- Frost GV, Epstein HE, Walker DA, Matyshak G, Ermokhina K (2013) Patterned-ground facilitates shrub expansion in Low Arctic tundra. *Environmental Research Letters*, **8**, 015035.
- Goetz SJ, Mac MC, Gurney KR, Randerson JT, Houghton RA (2007) Ecosystem responses to recent climate change and fire disturbance at northern high latitudes: observations and model results contrasting northern Eurasia and North America. *Environmental Research Letters*, **2**, 045031.
- Graae BJ, Ejrnæs R, Lang SI, Meineri E, Ibarra PT, Bruun HH (2010) Strong microsite control of seedling recruitment in tundra. *Oecologia*, **166**, 565–576.
- Guisan A, Thuiller W (2005) Predicting species distribution: offering more than simple habitat models. *Ecology Letters*, **8**, 993–1009.
- Higuera PE, Brubaker LB, Anderson PM, Brown TA, Kennedy AT, Hu FS (2008) Frequent fires in ancient shrub tundra: Implications of paleorecords for arctic environmental change. *PLoS ONE*, **3**, e0001744.
- Higuera PE, Brubaker LB, Anderson PM, Hu FS, Brown TA (2009) Vegetation mediated the im-

|     |                                                                                                                                                                                                                                                                             |     |
|-----|-----------------------------------------------------------------------------------------------------------------------------------------------------------------------------------------------------------------------------------------------------------------------------|-----|
| 869 | acts of postglacial climate change on fire regimes in the south-central Brooks Range, Alaska. <i>Ecological Monographs</i> , <b>79</b> , 201–219.                                                                                                                           | 931 |
| 870 | Hoffmann AA, Camac JS, Williams RJ, Papst WA, Jarrad FC, Wahren CH (2010) Phenological changes in six Australian subalpine plants in response to experimental warming and year-to-year variation. <i>Journal of Ecology</i> , <b>98</b> , 927–937.                          | 932 |
| 871 | Hoffmann AA, Sgrò CM (2011) Climate change and evolutionary adaptation. <i>Nature</i> , <b>470</b> , 479–485.                                                                                                                                                               | 933 |
| 872 | Hoffmann WA (2003) Regional feedbacks among fire, climate, and tropical deforestation. <i>Journal of Geophysical Research</i> , <b>108</b> , 4721–11.                                                                                                                       | 934 |
| 873 | Hollister RD, Webber PJ, Bay C (2005) Plant response to temperature in Northern Alaska: Implications for predicting vegetation change. <i>Ecology</i> , <b>86</b> , 1562–1570.                                                                                              | 935 |
| 874 | Hudson JMG, Henry GHR (2009) Increased plant biomass in a High Arctic heath community from 1981 to 2008. <i>Ecology</i> , <b>90</b> , 2657–2663.                                                                                                                            | 936 |
| 875 | IPCC (2013) <i>Climate Change 2013: The physical science basis. Contribution of working group I to the fifth assessment report of the intergovernmental panel on climate change</i> . Cambridge University Press, Cambridge, United Kingdom and New York, NY, USA, 1535 pp. | 937 |
| 876 | Keeley JE, Bond WJ, Bradstock RA, Pausas JG, Rundel PW (2012) <i>Fire in Mediterranean ecosystems. Ecology, evolution and management</i> . Cambridge University Press.                                                                                                      | 938 |
| 877 | Klady RA, Henry GHR, Lemay V (2011) Changes in high arctic tundra plant reproduction in response to long-term experimental warming. <i>Global Change Biology</i> , <b>17</b> , 1611–1624.                                                                                   | 939 |
| 878 | Klanderud K (2005) Climate change effects on species interactions in an alpine plant community. <i>Journal of Ecology</i> , <b>93</b> , 127–137.                                                                                                                            | 940 |
| 879 | Krawchuk MA, Cumming SG (2011) Effects of biotic feedback and harvest management on boreal forest fire activity under climate change. <i>Ecological Applications</i> , <b>21</b> , 122–136.                                                                                 | 941 |
| 880 | Lantz TC, Marsh P, Kokelj SV (2013) Recent shrub proliferation in the Mackenzie Delta uplands and microclimatic implications. <i>Ecosystems</i> , <b>16</b> , 47–59.                                                                                                        | 942 |
| 881 | Mack MC, Bret-Harte MS, Hollingsworth TN, Jandt R, Schuur EAG, Shaver GR, Verbyla DL (2011) Carbon loss from an unprecedented Arctic tundra wildfire. <i>Nature</i> , <b>475</b> , 489–492.                                                                                 | 943 |
| 882 | Matthews S, Sullivan AL, Watson P, Williams RJ (2012) Climate change, fuel and fire behaviour in a eucalypt forest. <i>Global Change Biology</i> , <b>18</b> , 3212–3223.                                                                                                   | 944 |
| 883 | McDougall KL (2003) Aerial photographic interpretation of vegetation changes on the Bogong High Plains, Victoria, between 1936 and 1980. <i>Austral Ecology</i> , <b>51</b> , 251–256.                                                                                      | 945 |
| 884 | Molau U, Mølgaard P (1996) <i>ITEX manual</i> . Danish Polar Centre, Copenhagen.                                                                                                                                                                                            | 946 |
| 885 | Moore ID, Gessler PE, Nielsen GA, Peterson GA (1993) Soil attribute prediction using terrain analysis. <i>Soil Science Society of America Journal</i> , <b>57</b> , 443–452.                                                                                                | 947 |
| 886 | Munier A, Hermanutz L, Jacobs JD, Lewis K (2010) The interacting effects of temperature, ground disturbance, and herbivory on seedling establishment: implications for treeline advance with climate warming. <i>Plant Ecology</i> , <b>210</b> , 19–30.                    | 948 |
| 887 | Myers-Smith IH, Forbes BC, Wilmking M, et al. (2011) Shrub expansion in tundra ecosystems: dynamics, impacts and research priorities. <i>Environmental Research Letters</i> , <b>6</b> , 045509.                                                                            | 949 |
| 888 | Post E, Pedersen C (2008) Opposing plant community responses to warming with and without herbivores. <i>Proceedings of the National Academy of Sciences</i> , <b>105</b> , 12353–12358.                                                                                     | 950 |
| 889 | Qiu J (2009) Tundra's burning. <i>Nature</i> , <b>461</b> , 34–36.                                                                                                                                                                                                          | 951 |
| 890 | R Core Team (2016) <i>R: A language and environment for statistical computing</i> . R Foundation for Statistical Computing, Vienna, Austria. URL <a href="https://www.R-project.org/">https://www.R-project.org/</a> .                                                      | 952 |
| 891 | Racine CH, Jandt R, Meyers C, Dennis J (2004) Tundra fire and vegetation change along a hillslope on the Seward Peninsula, Alaska, U.S.A. <i>Arctic Antarctic and Alpine Research</i> , <b>36</b> , 1–10.                                                                   | 953 |
| 892 | Sánchez-Bayo F, Green K (2013) Australian snowpack disappearing under the influence of global warming and solar activity. <i>Arctic Antarctic and Alpine Research</i> , <b>45</b> , 107–118.                                                                                | 954 |
| 893 | Stan Development Team (2016) Stan: A c++ library for probability and sampling, version 2.9.0-3. URL <a href="http://mc-stan.org/">http://mc-stan.org/</a> .                                                                                                                 | 955 |
| 894 | Sturm M, Racine CH, Tape K (2001) Climate change: increasing shrub abundance in the Arctic. <i>Nature</i> , <b>411</b> , 546–547.                                                                                                                                           | 956 |
| 895 | Tucker CM, Rebelo AG, Manne LL (2012) Contribution of disturbance to distribution and abundance in a fire-adapted system. <i>Ecography</i> , <b>35</b> , 348–355.                                                                                                           | 957 |
| 896 | Turner MG (2010) Disturbance and landscape dynamics in a changing world. <i>Ecology</i> , <b>91</b> , 2833–2849.                                                                                                                                                            | 958 |
| 897 | Venn SE, Morgan JW (2009) Patterns in alpine seedling emergence and establishment across a stress gradient of mountain summits in south-eastern Australia. <i>Plant Ecology &amp; Diversity</i> , <b>2</b> , 5–16.                                                          | 959 |
| 898 | Wahren CH, Camac JS, Jarrad FC, Williams RJ, Papst WA, Hoffmann AA (2013) Experimental warming and long-term vegetation dynamics in an alpine heathland. <i>Australian Journal of Botany</i> , <b>61</b> , 36–51.                                                           | 960 |
| 899 | Walck JL, Hidayati SN, Dixon KW, Thompson K, Poschlod P (2011) Climate change and plant regeneration from seed. <i>Global Change Biology</i> , <b>17</b> , 2145–2161.                                                                                                       | 961 |
| 900 | Walker MD, Wahren CH, Hollister RD, et al. (2006) Plant community responses to experimental warming across the tundra biome. <i>Proceedings of the National Academy of Sciences</i> , <b>103</b> , 1342–1346.                                                               | 962 |
| 901 | Walsh NG, McDougall KL (2004) Progress in the recovery of the flora of treeless subalpine vegetation in Kosciuszko National Park after the 2003 fires. <i>Cunninghamia</i> , <b>8</b> , 439–452.                                                                            | 963 |
| 902 | Wenk EH, Falster DS (2015) Quantifying and understanding reproductive allocation schedules in plants. <i>Ecology and Evolution</i> , <b>5</b> , 5521–5538.                                                                                                                  | 964 |
| 903 | Westerling A, Hidalgo H, Cayan D, Swetnam TW (2006) Warming and earlier spring increase western US forest wildfire activity. <i>Nature</i> , <b>313</b> , 940.                                                                                                              | 965 |
| 904 | Westerling A, Turner MG, Smithwick EAH, Romme WH, Ryan MG (2011) Continued warming could transform Greater Yellowstone fire regimes by mid-21st century. <i>Proceedings of the National Academy of Sciences</i> , <b>108</b> , 13165–13170.                                 | 966 |
| 905 | Whight S, Bradstock RA (1999) Indices of fire characteristics in sandstone heath near Sydney, Australia. <i>International Journal of Wildland Fire</i> , <b>9</b> , 145–153.                                                                                                | 967 |
| 906 | Williams RJ, Ashton DH (1987) Effects of disturbance and grazing by cattle on the dynamics of heathland and grassland communities on the Bogong High Plains Victoria Australia. <i>Australian Journal of Botany</i> , <b>35</b> , 413–432.                                  | 968 |
| 907 | Williams RJ, Papst WA, McDougall KL, et al. (2014) Alpine ecosystems. In: <i>Biodiversity and environmental change: Monitoring, challenges and directions</i> (eds. Lindenmayer DB, Burns E, Thurgate N, Lowe A), pp. 167–212. CSIRO Publishing, Melbourne.                 | 969 |
| 908 | Williams RJ, Wahren CH, Bradstock RA, Muller WJ (2006) Does alpine grazing reduce blazing? A landscape test of a widely-held hypothesis. <i>Austral Ecology</i> , <b>31</b> , 925–936.                                                                                      | 970 |
| 909 | Williams RJ, Wahren CH, Stott KAJ, et al. (2015) An International Union for the Conservation of Nature Red List ecosystems risk assessment for alpine snow patch herbfields, South-Eastern Australia. <i>Austral Ecology</i> , <b>40</b> , 433–443.                         | 971 |
| 910 | Williams RJ, Wahren CH, Tolsma AD, et al. (2008) Large fires in Australian alpine landscapes: their part in the historical fire regime and their impacts on alpine biodiversity. <i>International Journal of Wildland Fire</i> , <b>17</b> , 793–808.                       | 972 |
| 911 | Wipf S, Stoeckli V, Bebi P (2009) Winter climate change in alpine tundra: plant responses to changes in snow depth and snowmelt timing. <i>Climatic Change</i> , <b>94</b> , 105–121.                                                                                       | 973 |
| 912 | Wookey PA, Aerts R, Bardgett RD, et al. (2009) Ecosystem feedbacks and cascade processes: understanding their role in the responses of Arctic and alpine ecosystems to environmental change. <i>Global Change Biology</i> , <b>15</b> , 1153–1172.                          | 974 |
| 913 |                                                                                                                                                                                                                                                                             | 975 |
| 914 |                                                                                                                                                                                                                                                                             | 976 |
| 915 |                                                                                                                                                                                                                                                                             | 977 |
| 916 |                                                                                                                                                                                                                                                                             | 978 |
| 917 |                                                                                                                                                                                                                                                                             | 979 |
| 918 |                                                                                                                                                                                                                                                                             | 980 |
| 919 |                                                                                                                                                                                                                                                                             | 981 |
| 920 |                                                                                                                                                                                                                                                                             | 982 |
| 921 |                                                                                                                                                                                                                                                                             | 983 |
| 922 |                                                                                                                                                                                                                                                                             | 984 |
| 923 |                                                                                                                                                                                                                                                                             | 985 |
| 924 |                                                                                                                                                                                                                                                                             | 986 |
| 925 |                                                                                                                                                                                                                                                                             | 987 |
| 926 |                                                                                                                                                                                                                                                                             | 988 |
| 927 |                                                                                                                                                                                                                                                                             | 989 |
| 928 |                                                                                                                                                                                                                                                                             | 990 |
| 929 |                                                                                                                                                                                                                                                                             | 991 |
| 930 |                                                                                                                                                                                                                                                                             | 992 |
